# Supplementary material
Source: Royal Society of Chemistry journal article supplement (doi:10.1039/d6dt00818f)
Supplement: d6dt00818f1.pdf [file d6dt00818f1.pdf]

Supporting Information for

**Synthesis of hydroxo-bridged Dy(III) dimers supported by  
crown ethers through C–H activation and oxygen-atom transfer  
of Me<sub>3</sub>NO**

Ziyi Gu,<sup>a,b</sup> Jun Li,<sup>a,c</sup> Xuan Zhang,<sup>a,c</sup> Yangjuan Li <sup>\*a</sup> and Yu Gong <sup>a</sup>

<sup>a</sup> State Key Laboratory of Thorium Energy, Shanghai Institute of Applied Physics,  
Chinese Academy of Sciences, Shanghai 201800, China

<sup>b</sup> ShanghaiTech University, Shanghai 201210, China

<sup>c</sup> University of Chinese Academy of Sciences, Beijing 100049, China

<sup>\*</sup>Corresponding Author (liyangjuan@sinap.ac.cn)

## 1 Crystallographic data

**Table S1.** Selected bond lengths (Å) and bond angles(deg) for complex 1.

| Atom  | Atom | Length/Å |
|-------|------|----------|
| Dy(1) | O(4) | 2.411(5) |
| Dy(1) | O(7) | 2.416(4) |
| Dy(1) | O(3) | 2.428(4) |
| Dy(1) | O(2) | 2.401(5) |
| Dy(1) | O(1) | 2.478(5) |
| Dy(1) | O(5) | 2.416(5) |
| Dy(1) | O(8) | 2.469(4) |
| Dy(1) | O(6) | 2.375(4) |
| Dy(1) | N(1) | 2.447(6) |

  

| Atom | Atom  | Atom | Angle/°   |
|------|-------|------|-----------|
| O(4) | Dy(1) | O(3) | 66.96(16) |
| O(4) | Dy(1) | O(1) | 65.04(17) |
| O(7) | Dy(1) | O(8) | 63.25(15) |
| O(2) | Dy(1) | O(3) | 66.51(16) |
| O(2) | Dy(1) | O(1) | 65.24(17) |
| O(5) | Dy(1) | O(8) | 64.45(18) |
| O(6) | Dy(1) | O(7) | 67.54(15) |
| O(6) | Dy(1) | O(5) | 68.37(16) |

**Table S2.** Selected bond lengths (Å) and bond angles(deg) for complex 2.

| Atom | Atom | Length/Å |
|------|------|----------|
|------|------|----------|

|       |       |           |
|-------|-------|-----------|
| Dy(1) | I(3)  | 2.9962(5) |
| Dy(1) | O(3)  | 2.389(4)  |
| Dy(1) | O(2)a | 2.426(3)  |
| Dy(1) | O(2)  | 2.426(3)  |
| Dy(1) | O(1)a | 2.401(4)  |
| Dy(1) | O(1)  | 2.401(4)  |
| Dy(1) | N(1)  | 2.445(4)  |
| Dy(1) | N(1)a | 2.445(4)  |

| Atom  | Atom  | Atom  | Angle/°   |
|-------|-------|-------|-----------|
| O(3)  | Dy(1) | O(2)  | 66.15(7)  |
| O(3)  | Dy(1) | O(2)a | 66.15(7)  |
| O(1)  | Dy(1) | O(2)  | 66.08(13) |
| O(1)a | Dy(1) | O(2)a | 66.08(13) |
| O(1)a | Dy(1) | O(1)  | 64.32(18) |

**Table S3.** Selected bond lengths (Å) and bond angles(deg) for complex **3**.

| Atom  | Atom  | Length/Å |
|-------|-------|----------|
| Dy(1) | O(1)  | 2.216(3) |
| Dy(1) | O(1)a | 2.228(2) |
| Dy(1) | O(2)  | 2.446(2) |
| Dy(1) | O(3)  | 2.521(2) |
| Dy(1) | O(4)  | 2.501(2) |
| Dy(1) | O(5)  | 2.457(2) |
| Dy(1) | N(1)  | 2.474(3) |

|             | Dy(1)       | I(1)        | 3.1450(3)      |
|-------------|-------------|-------------|----------------|
| <b>Atom</b> | <b>Atom</b> | <b>Atom</b> | <b>Angle/°</b> |
| O(2)        | Dy(1)       | O(3)        | 64.73(8)       |
| O(4)        | Dy(1)       | O(3)        | 65.51(8)       |
| O(5)        | Dy(1)       | O(4)        | 65.80(8)       |
| O(2)        | Dy(1)       | O(5)        | 65.70(9)       |
| Dy(1)       | O(1)        | Dy(1)a      | 109.45(10)     |

**Table S4.** Selected bond lengths (Å) and bond angles(deg) for complex 4.

| <b>Atom</b> | <b>Atom</b> | <b>Length/Å</b> |
|-------------|-------------|-----------------|
| Dy(1)       | O(1)        | 2.190(5)        |
| Dy(1)       | O(1)a       | 2.253(4)        |
| Dy(1)       | O(3)        | 2.430(4)        |
| Dy(1)       | O(5)        | 2.453(5)        |
| Dy(1)       | O(2)        | 2.410(4)        |
| Dy(1)       | O(4)        | 2.446(4)        |
| Dy(1)       | O(6)        | 2.516(5)        |
| Dy(1)       | N(1)        | 2.468(6)        |

  

| <b>Atom</b> | <b>Atom</b> | <b>Atom</b> | <b>Angle/°</b> |
|-------------|-------------|-------------|----------------|
| O(2)        | Dy(1)       | O(3)        | 64.17(15)      |
| O(3)        | Dy(1)       | O(4)        | 66.13(16)      |
| O(4)        | Dy(1)       | O(5)        | 63.28(16)      |
| O(5)        | Dy(1)       | O(6)        | 64.03(17)      |

|       |       |        |           |
|-------|-------|--------|-----------|
| O(2)  | Dy(1) | O(6)   | 64.29(16) |
| Dy(1) | O(1)  | Dy(1)a | 110.2(2)  |

---

**Table S5.** Selected bond lengths (Å) and bond angles(deg) for complex **5**.

| Atom  | Atom | Length/Å |
|-------|------|----------|
| Dy(1) | O(5) | 2.388(6) |
| Dy(1) | O(4) | 2.424(7) |
| Dy(1) | O(6) | 2.402(7) |
| Dy(1) | O(8) | 2.414(7) |
| Dy(1) | O(2) | 2.411(6) |
| Dy(1) | O(7) | 2.419(8) |
| Dy(1) | O(9) | 2.477(8) |
| Dy(1) | O(3) | 2.472(6) |
| Dy(1) | O(1) | 2.323(7) |

---

| Atom | Atom  | Atom | Angle/° |
|------|-------|------|---------|
| O(2) | Dy(1) | O(3) | 64.6(2) |
| O(4) | Dy(1) | O(3) | 63.5(2) |
| O(5) | Dy(1) | O(4) | 66.6(2) |
| O(5) | Dy(1) | O(2) | 68.1(2) |
| O(6) | Dy(1) | O(7) | 67.7(3) |
| O(8) | Dy(1) | O(7) | 67.4(2) |
| O(8) | Dy(1) | O(9) | 65.8(2) |
| O(6) | Dy(1) | O(9) | 64.8(2) |

---

**Table S6.** Selected bond lengths (Å) and bond angles(deg) for complex **6**.

| <b>Atom</b> | <b>Atom</b> | <b>Length/Å</b> |
|-------------|-------------|-----------------|
| Dy(1)       | O(1)        | 2.305(3)        |
| Dy(1)       | O(2)        | 2.366(2)        |
| Dy(1)       | O(3)        | 2.3886(17)      |
| Dy(1)       | O(3)a       | 2.3886(17)      |
| Dy(1)       | O(4)        | 2.3482(18)      |
| Dy(1)       | O(4)a       | 2.3482(18)      |
| Dy(1)       | N(1)        | 2.458(2)        |
| Dy(1)       | N(1)a       | 2.458(2)        |

  

| <b>Atom</b> | <b>Atom</b> | <b>Atom</b> | <b>Angle/°</b> |
|-------------|-------------|-------------|----------------|
| O(2)        | Dy(1)       | O(3)        | 67.19(4)       |
| O(2)        | Dy(1)       | O(3)a       | 67.19(4)       |
| O(4)        | Dy(1)       | O(3)        | 66.94(6)       |
| O(4)a       | Dy(1)       | O(3)a       | 66.94(6)       |
| O(4)        | Dy(1)       | O(4)a       | 64.36(9)       |

## 2 Powder X-ray diffraction

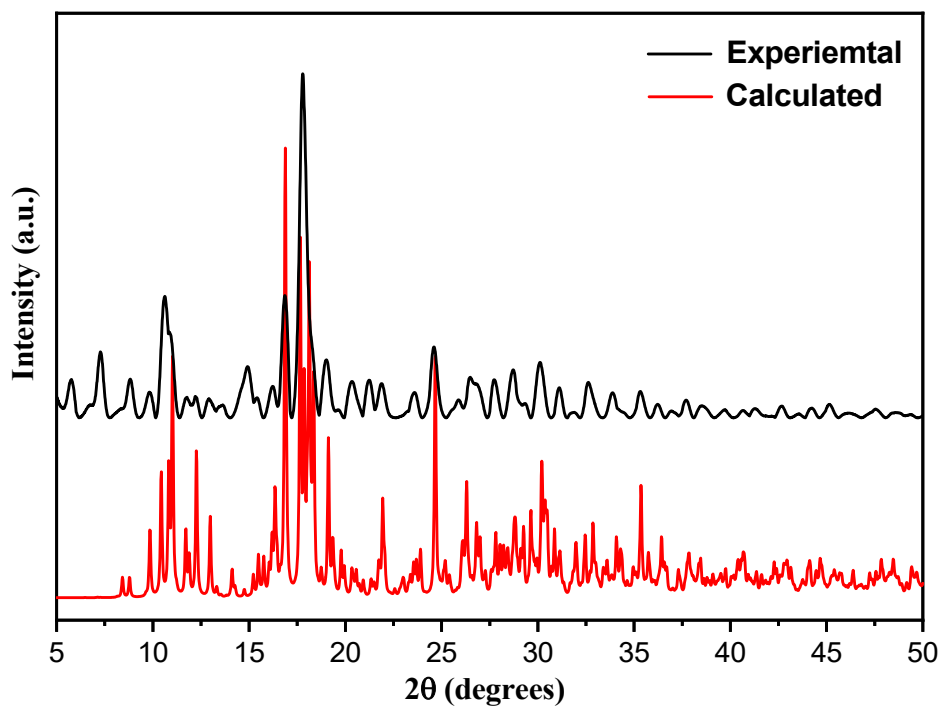

**Fig. S1.** PXRD pattern calculated from single-crystal data of  $[\text{Dy}(\text{12-crown-4})_2(\text{CH}_3\text{CN})]_3\text{I}_3$  (**1**) compared to experimental data of the precipitate isolated.

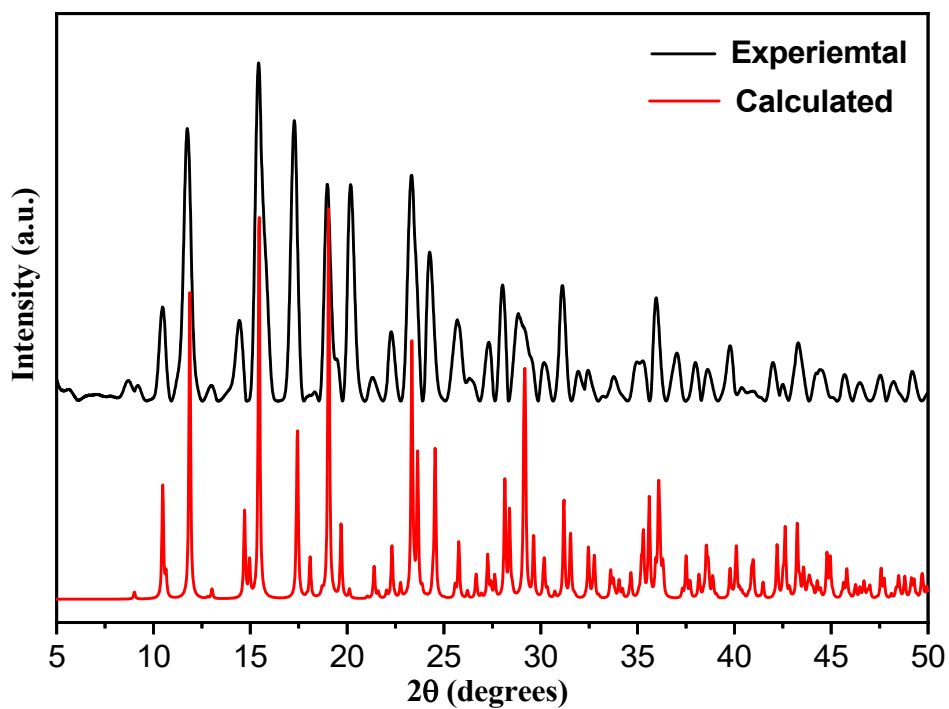

**Fig. S2.** PXRD pattern calculated from single-crystal data of  $[\text{Dy}(\text{15-crown-5})_2(\text{CH}_3\text{CN})]_3\text{I}_3$ .

5)(CH<sub>3</sub>CN)<sub>2</sub>I]I<sub>2</sub> (**2**) compared to experimental data of the precipitate isolated.

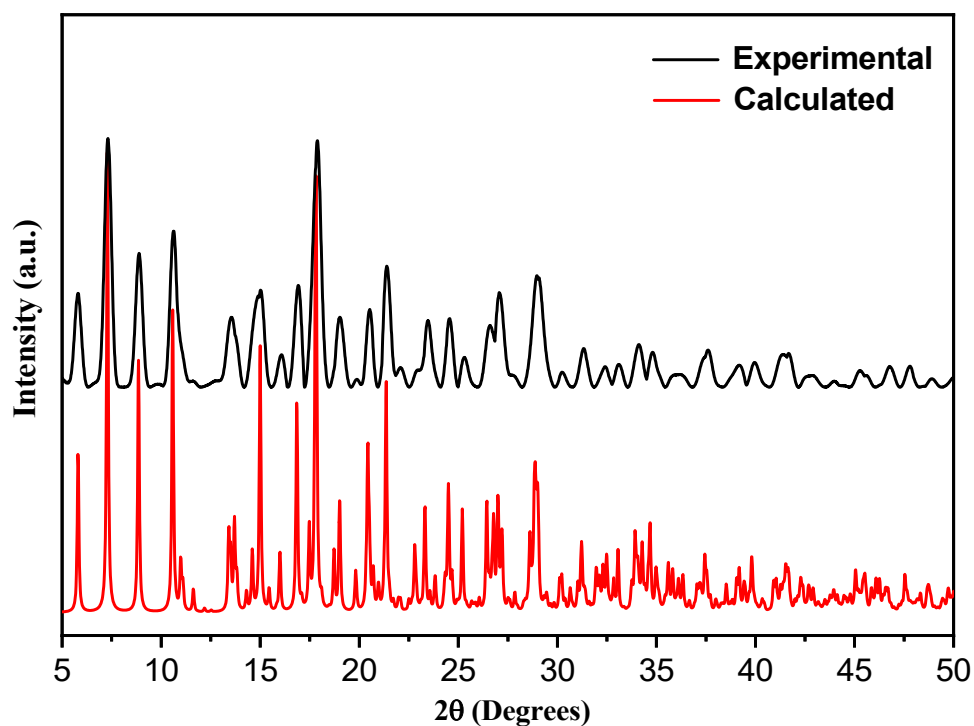

**Fig. S3.** PXRD pattern calculated from single-crystal data of [Dy(12-crown-4)<sub>2</sub>(H<sub>2</sub>O)](CH<sub>3</sub>CN)<sub>3</sub>I<sub>3</sub> (**5**) compared to experimental data of the precipitate isolated.

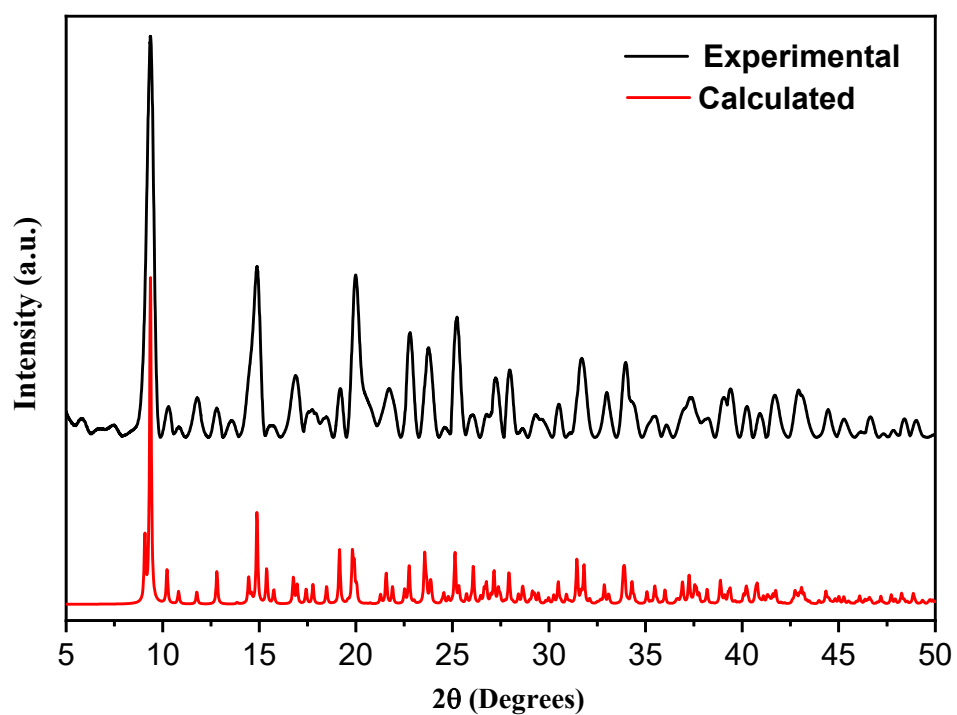

**Fig. S4.** PXRD pattern calculated from single-crystal data of  $[\text{Dy}(\text{12-crown-4})(\mu\text{-OH})(\text{CH}_3\text{CN})\text{I}]_2\text{I}_2(\text{CH}_3\text{CN})_2$  (**3**) compared to experimental data obtained from the crystal formed by the reaction of complex **5** with  $\text{Me}_3\text{NO}$ .

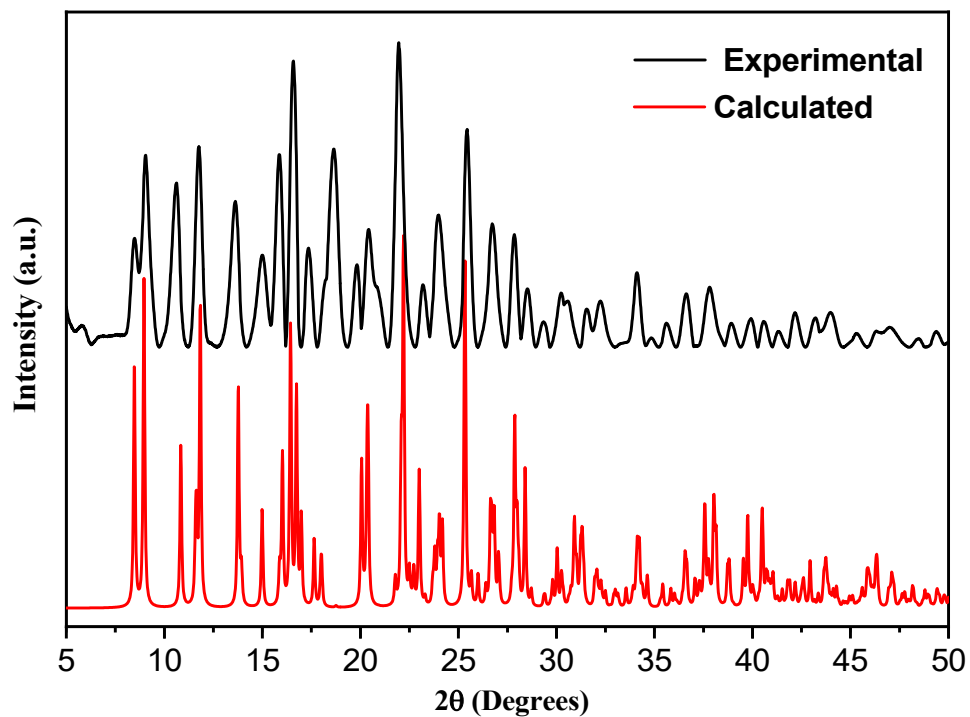

**Fig. S5.** PXRD pattern calculated from single crystal data of  $[\text{Dy}(\text{15-crown-5})(\mu\text{-OH})(\text{CH}_3\text{CN})]_2\text{I}_4$  (**4**) compared to experimental data obtained from the crystal formed by the reaction of complex **6** with  $\text{Me}_3\text{NO}$ .

### 3 $^1\text{H}$ NMR spectra

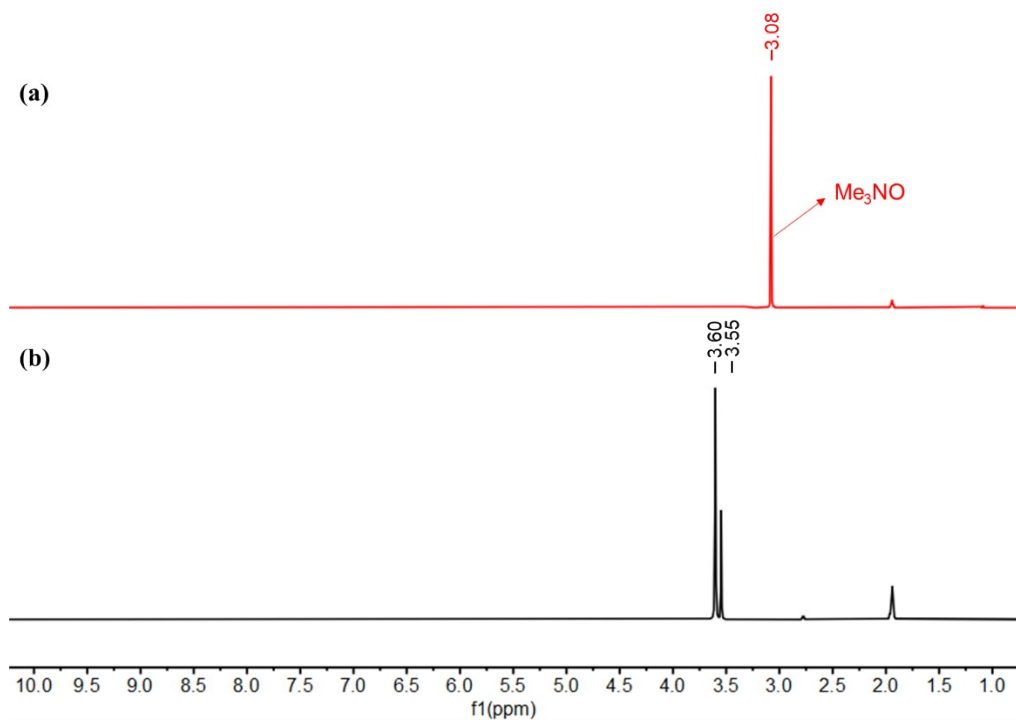

**Fig. S6.**  $^1\text{H}$  NMR spectra of  $\text{Me}_3\text{NO}$  (a) and the soluble fraction of the non-volatile residues obtained from the acetonitrile solution where complex **3** was formed (b) in  $\text{CD}_3\text{CN}$ .

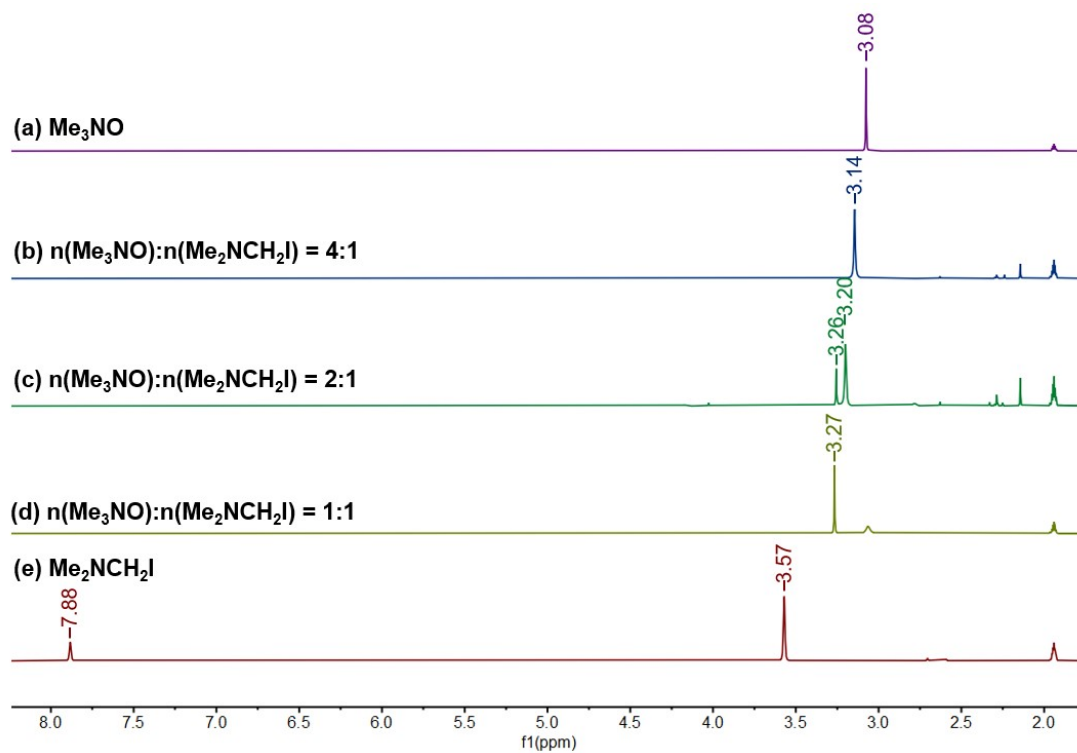

**Fig. S7.**  $^1\text{H}$  NMR spectra of  $\text{Me}_3\text{NO}$  and  $\text{Me}_2\text{NCH}_2\text{I}$  in different ratio in  $\text{CD}_3\text{CN}$ .

#### 4 Plausible reaction mechanism

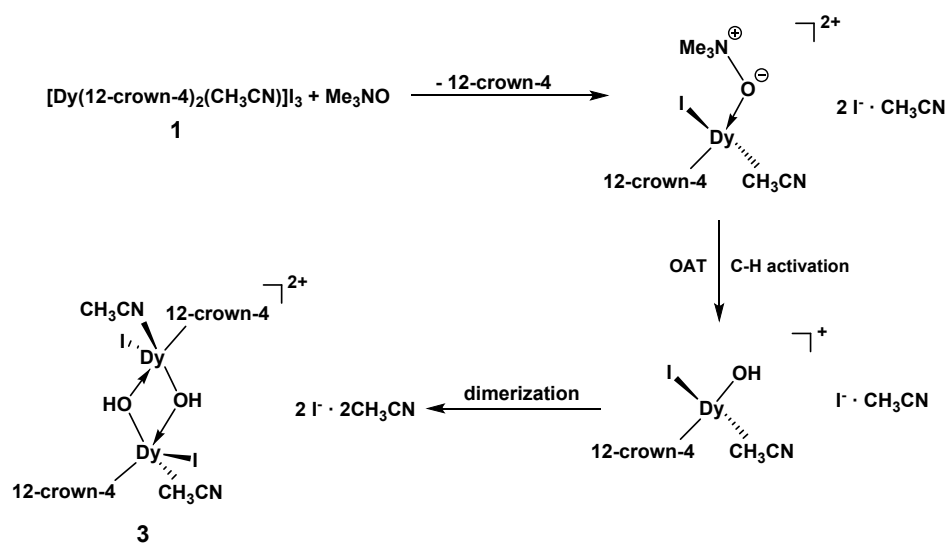

**Scheme S1** Proposed reaction mechanism for the formation of complex **3**.  $\text{Me}_3\text{NO}$  first replaces one molecule of  $\text{12-crown-4}$  in complex **1** to form an adduct of  $\text{Dy}(\text{III})$ . An intermediate coordinated with a hydroxo ligand is then formed through C–H activation along with OAT of  $\text{Me}_3\text{NO}$ , which is further dimerized to form complex **3**.
